# Supplementary material for: Pharyngeal carriage of Neisseria species in the African meningitis belt
Source: PubMed Central journal article supplement (PMC4879866; doi:10.1016/j.jinf.2016.03.010), 2016-06

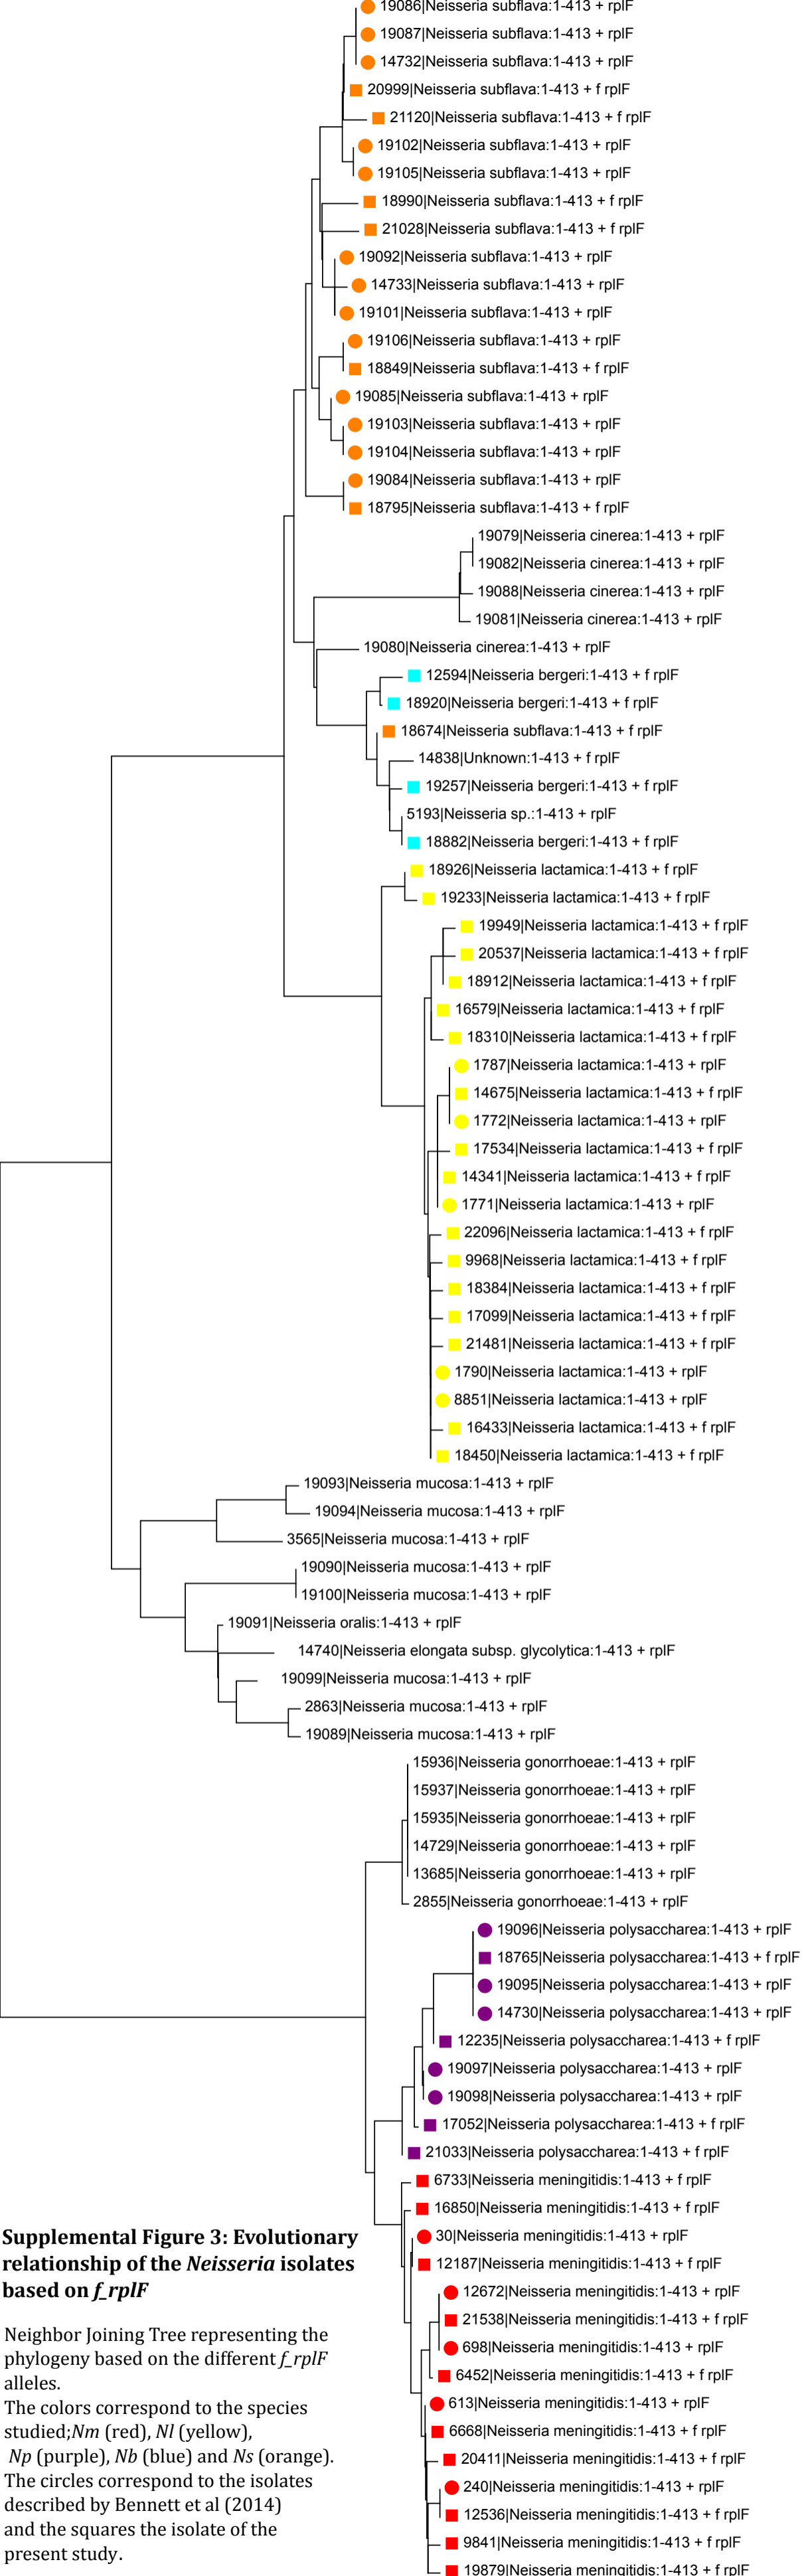

Supplement: mmc2.pdf [file mmc2.pdf]
